# Supplementary material for: Investigating Instructor Talk among Graduate Teaching Assistants in Undergraduate Biology Laboratory Classrooms
Source: Atypon-hosted journal article supplement (doi:10.1187/cbe.21-10-0302), 2022-04-26
Supplement: combinedsupmats.pdf [file combinedsupmats.pdf]

# Supplemental Material

CBE—Life Sciences Education

Gelinas *et al.*

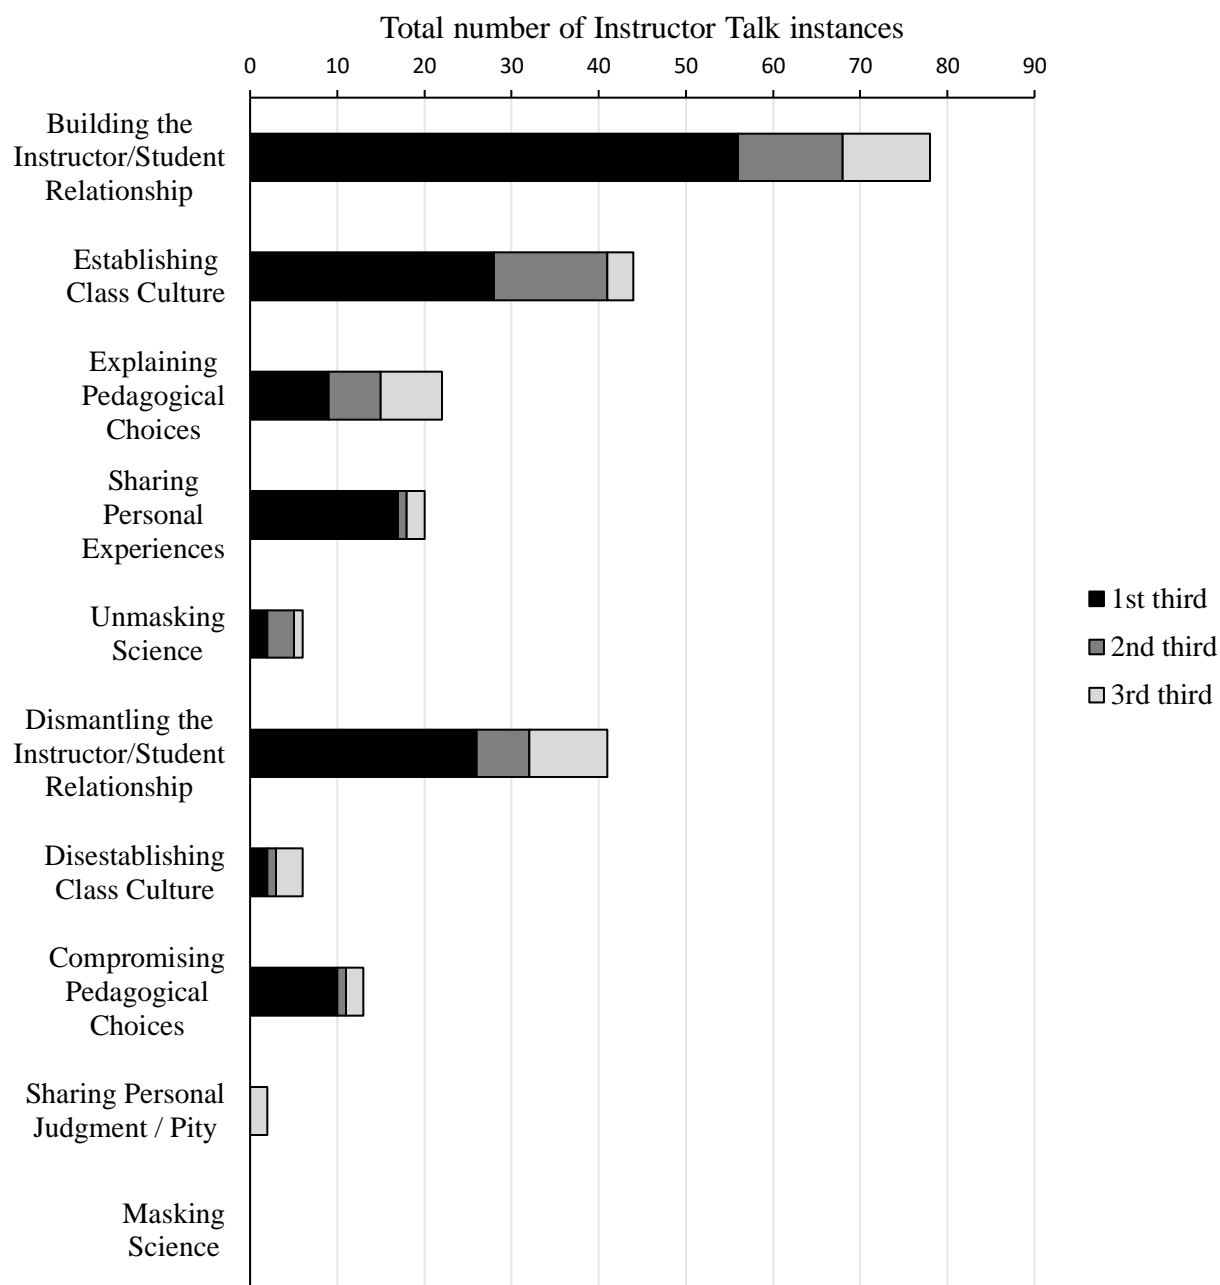

**Supplemental Figure A.** Comparing the categorical distribution of total number of Instructor Talk instances across class sessions by thirds. A total of ten class sessions are represented: two class sessions for each of the five GTAs in the pilot study. The total number of Instructor Talk instances that fell within the first third of a class session are shown in black, the second third are shown in dark grey, and the last third are shown in light grey. Top five categories on the y-axis are from the Positively Phrased Instructor Talk framework, and the bottom five categories are from the Negatively Phrased Instructor Talk framework.
